# Supplementary material for: Highly efficient green phosphor Ca 4 La(PO 4 ) 3 O:Eu 2+ ,Tb 3+ for white LEDs
Source: Royal Society of Chemistry journal article supplement (doi:10.1039/d4dt03241a), 2025-01-01
Supplement: d4dt03241a1.pdf [file d4dt03241a1.pdf]

## **Highly Efficient Green Phosphor $\text{Ca}_4\text{La}(\text{PO}_4)_3\text{O}:\text{Eu}^{2+},\text{Tb}^{3+}$ For white LEDs**

Congcong Fan<sup>a,b</sup>, Dashuai Sun<sup>b,\*</sup>, Zeyu Lyu<sup>b</sup>, Sida Shen<sup>b</sup>, Pengcheng Luo<sup>b</sup>, Luhui Zhou<sup>a,b</sup>, Zheng Lu<sup>b</sup>, Xiaowei Zhang<sup>b</sup>, and Hongpeng You<sup>a,b,\*</sup>

a School of Rare Earths, University of Science and Technology of China, Hefei 230026, P. R. China.

b Key Laboratory of Rare Earths and Institute of Material and Chemistry, Ganjiang Innovation Academy, Chinese Academy of Sciences, Ganzhou 341000, P. R. China.

\* Corresponding authors.

E-mail: [dssun@gia.cas.cn](mailto:dssun@gia.cas.cn), [hpyou@ciac.ac.cn](mailto:hpyou@ciac.ac.cn)

**Table S1** Atomic positions, occupancies, and atomic displacement parameters of CLPO:0.02Eu<sup>2+</sup>.

| atom | site | x       | y       | z       | occ   | uiso  |
|------|------|---------|---------|---------|-------|-------|
| Ca1  | 4f   | 0.33333 | 0.66667 | 0.00085 | 0.998 | 0.021 |
| Eu1  | 4f   | 0.33333 | 0.66667 | 0.00085 | 0.002 | 0.021 |
| Ca2  | 6h   | 0.00808 | 0.24839 | 0.25000 | 0.664 | 0.015 |
| Eu2  | 6h   | 0.01218 | 0.25801 | 0.25000 | 0.003 | 0.015 |
| Eu3  | 6h   | 0.01505 | 0.22636 | 0.25000 | 0.330 | 0.014 |
| La1  | 6h   | 0.01505 | 0.22636 | 0.25000 | 0.003 | 0.014 |
| P1   | 6h   | 0.40470 | 0.37460 | 0.25000 | 1.000 | 0.019 |
| O1   | 6h   | 0.33460 | 0.49130 | 0.25000 | 1.000 | 0.014 |
| O2   | 6h   | 0.59370 | 0.46960 | 0.25000 | 1.000 | 0.020 |
| O3   | 12i  | 0.34690 | 0.26360 | 0.07150 | 1.000 | 0.022 |
| O4   | 4e   | 0.00000 | 0.00000 | 0.20480 | 0.500 | 0.021 |

**Table S2.** Atomic positions, occupancies, and atomic displacement parameters of CLPO:0.02Eu<sup>2+</sup>,0.7Tb<sup>3+</sup>.

| atom | site | x       | y       | z        | occ   | uiso  |
|------|------|---------|---------|----------|-------|-------|
| Ca1  | 4f   | 0.33333 | 0.66667 | -0.00160 | 0.998 | 0.015 |
| Eu1  | 4f   | 0.33333 | 0.66667 | -0.00160 | 0.002 | 0.015 |
| Ca2  | 6h   | 0.00855 | 0.24823 | 0.25000  | 0.664 | 0.007 |
| Eu2  | 6h   | 0.00855 | 0.24823 | 0.25000  | 0.003 | 0.007 |
| Eu3  | 6h   | 0.01235 | 0.23133 | 0.25000  | 0.003 | 0.022 |
| La1  | 6h   | 0.01235 | 0.23133 | 0.25000  | 0.099 | 0.022 |
| Tb1  | 6h   | 0.01235 | 0.23133 | 0.25000  | 0.231 | 0.022 |
| P1   | 6h   | 0.40470 | 0.37460 | 0.25000  | 1.000 | 0.011 |
| O1   | 6h   | 0.33460 | 0.49130 | 0.25000  | 1.000 | 0.008 |
| O2   | 6h   | 0.59370 | 0.46860 | 0.25000  | 1.000 | 0.009 |
| O3   | 12i  | 0.34690 | 0.26360 | 0.07150  | 1.000 | 0.003 |
| O4   | 4e   | 0.00000 | 0.00000 | 0.20480  | 0.500 | 1.000 |

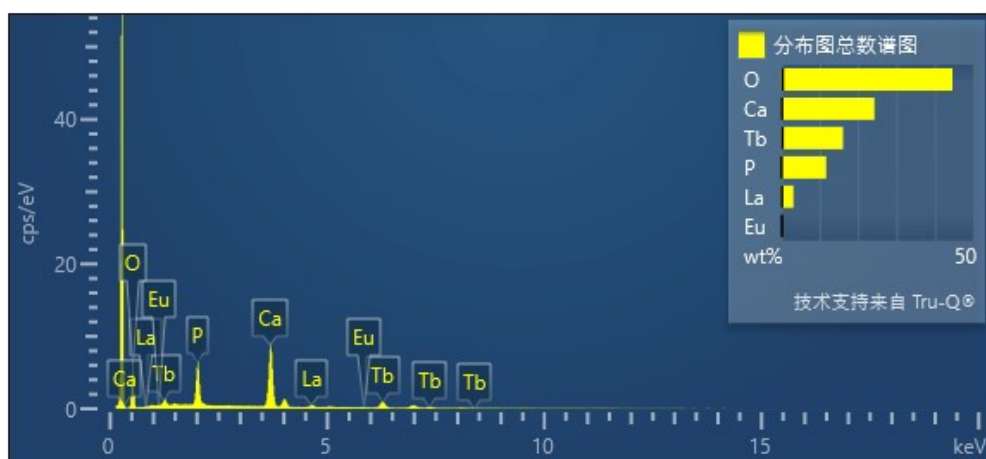**Figure S1** EDS spectra and mass ratio of elements of CLPO:0.02Eu<sup>2+</sup>,0.7Tb<sup>3+</sup>

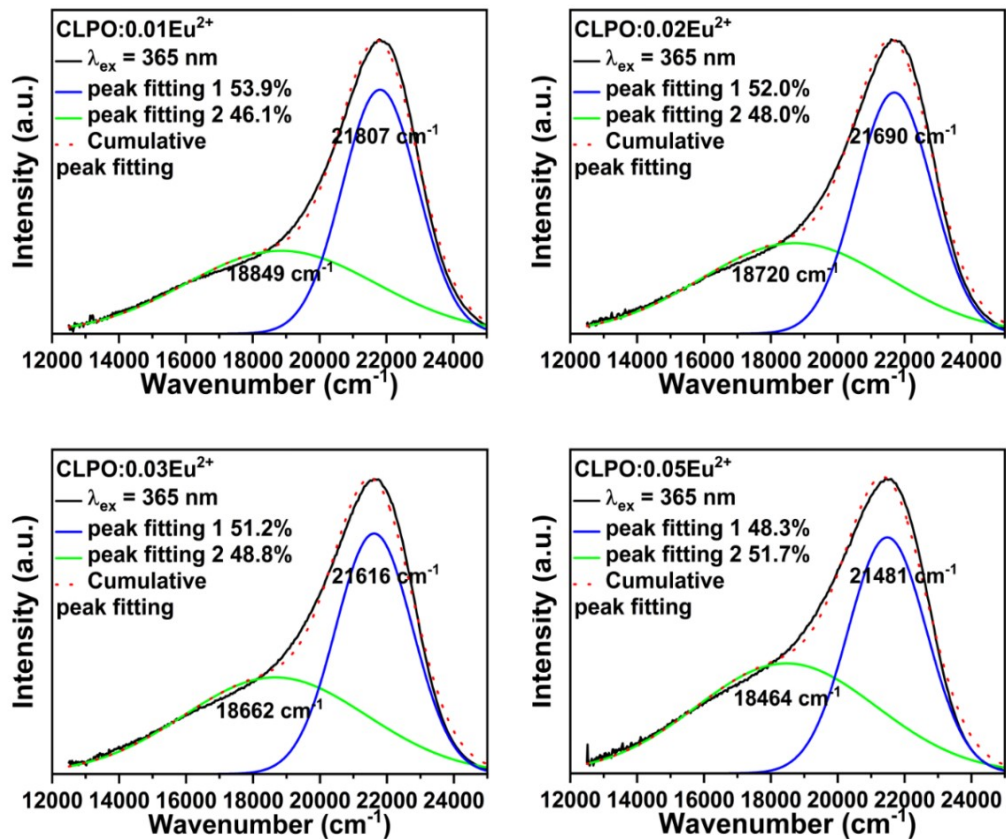

Figure S2 Gaussian peak splitting in the emission spectra of CLPO: $x\text{Eu}^{2+}$  ( $x = 0.01-0.05$ ).

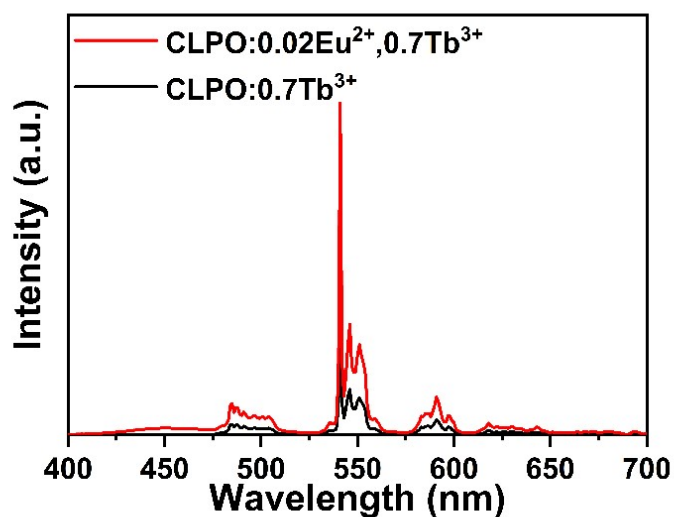

Figure S3 Emission spectra of CLPO:0.02 $\text{Eu}^{2+}, 0.7\text{Tb}^{3+}$  and CLPO:0.7 $\text{Tb}^{3+}$  under 365 nm light excitation at the same conditions.

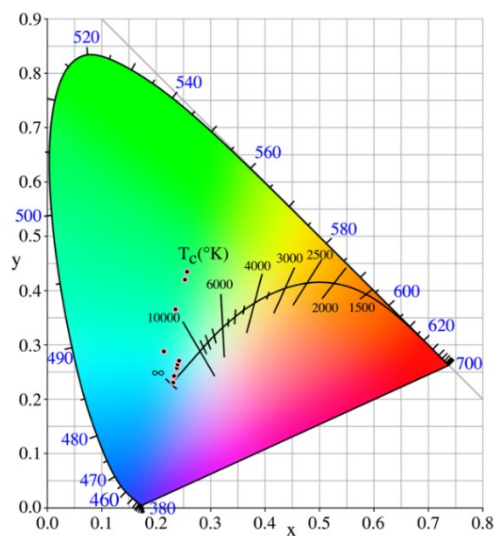

Figure S4 Change in color coordinates.

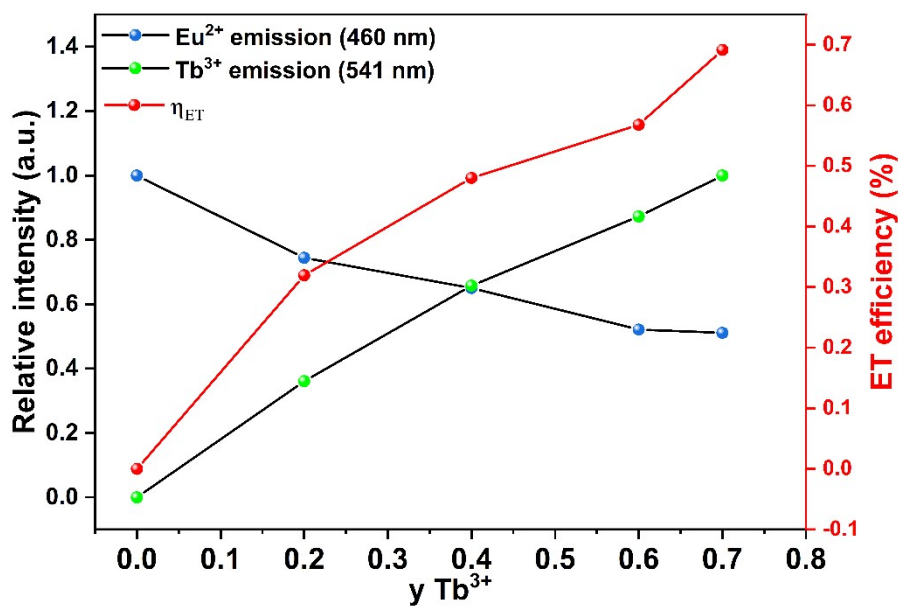

Figure S5 Relative emission intensity of Eu<sup>2+</sup> and Tb<sup>3+</sup> and the energy transfer efficiency  $\eta_{ET}$  as a function of Tb<sup>3+</sup> concentration.

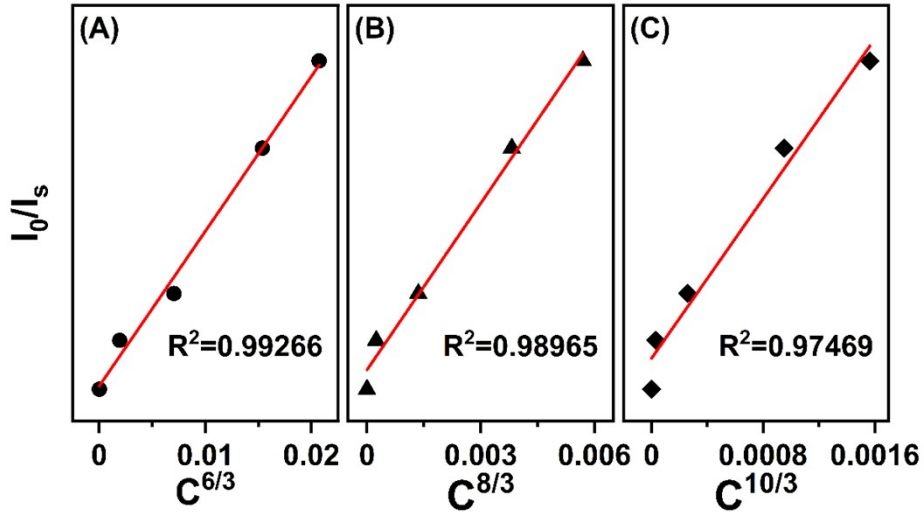

Figure S6 Plots of  $I_0/I_s$  versus  $C^{n/3}$  ( $n = 6, 8$  and  $10$ ).

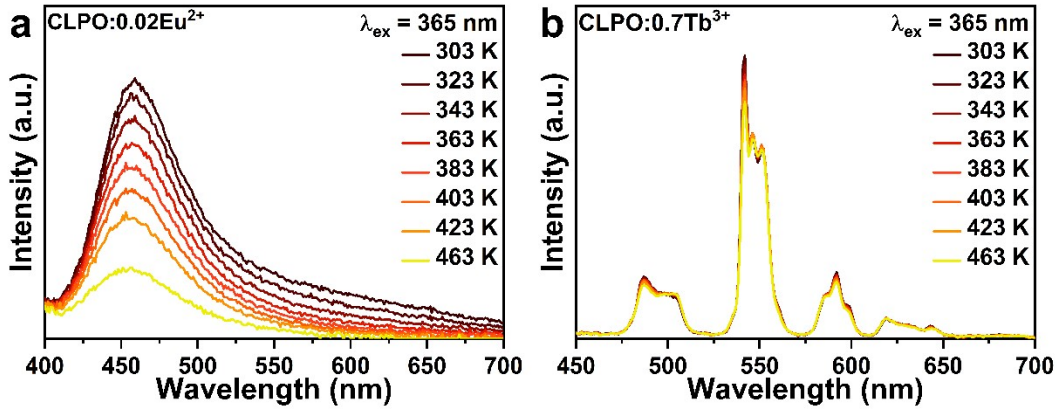

Figure S7 Temperature-dependent emission spectra of CLPO:0.02Eu<sup>2+</sup> (a) and CLPO:0.7Tb<sup>3+</sup> (b) ( $\lambda_{ex} = 365$  nm).

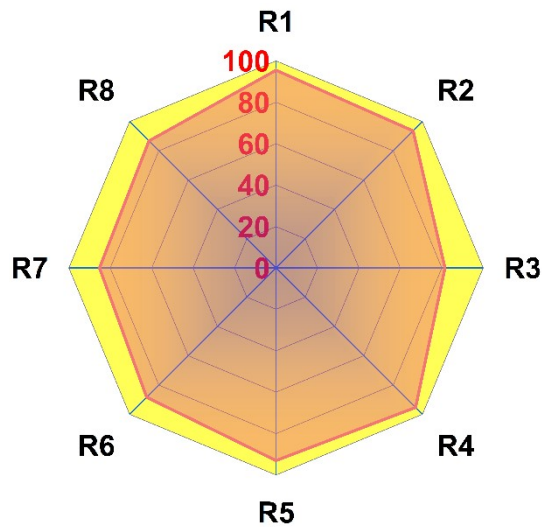

Figure S8. R1-R8 of WLED
